# Supplementary material for: Production of Recombinant Human Ceruloplasmin: Improvements and Perspectives
Source: Int J Mol Sci. 2021 Jul 30;22(15):8228. doi: 10.3390/ijms22158228 (PMC8347646; doi:10.3390/ijms22158228)
Supplement: Supplementary file 1 [file ijms-22-08228-s001.zip › Supplementary Data.xlsx]

## Sheet: Protein groups
Protein IDs	Majority protein IDs	Peptide counts (all)	Peptide counts (razor+unique)	Peptide counts (unique)	Fasta headers	Number of proteins	Peptides	Razor + unique peptides	Unique peptides	Peptides 18H2O	Peptides PNGF_18H2O	Razor + unique peptides 18H2O	Razor + unique peptides PNGF_18H2O	Unique peptides 18H2O	Unique peptides PNGF_18H2O	Sequence coverage [%]	Unique + razor sequence coverage [%]	Unique sequence coverage [%]	Mol. weight [kDa]	Sequence length	Sequence lengths	Q-value	Score	Sequence coverage 18H2O [%]	Sequence coverage PNGF_18H2O [%]	Intensity	Intensity 18H2O	Intensity PNGF_18H2O	MS/MS Count	Only identified by site	Reverse	Potential contaminant	id	Peptide IDs	Peptide is razor	Mod. peptide IDs	Evidence IDs	MS/MS IDs	Best MS/MS	Deamidation 18O (N) site IDs	Oxidation (M) site IDs	Deamidation 18O (N) site positions	Oxidation (M) site positions
Humanceruloplasmin(M13699)	Humanceruloplasmin(M13699)	82	82	75		1	82	82	75	68	82	68	82	61	75	78.7	78.7	76.2	122.2	1065	1065	0	323.31	69.1	78.7	34614000000	18023000000	16591000000	1396				25	0;1;2;4;5;6;8;9;12;13;14;15;17;19;20;22;24;25;27;28;29;30;31;32;34;35;38;39;40;44;47;48;49;50;60;61;62;63;64;65;66;67;68;70;77;81;82;83;84;85;87;92;93;94;95;96;98;103;104;105;109;111;113;114;115;116;118;125;133;134;135;136;137;138;141;143;144;146;148;149;150;152	True;True;True;True;True;True;True;True;True;True;True;True;True;True;True;True;True;True;True;True;True;True;True;True;True;True;True;True;True;True;True;True;True;True;True;True;True;True;True;True;True;True;True;True;True;True;True;True;True;True;True;True;True;True;True;True;True;True;True;True;True;True;True;True;True;True;True;True;True;True;True;True;True;True;True;True;True;True;True;True…	0;1;2;4;5;6;8;9;12;13;14;15;17;18;20;21;22;24;26;27;28;30;31;32;33;34;35;36;37;38;39;40;42;43;44;45;48;49;50;54;57;58;59;60;61;71;72;73;74;75;76;77;78;79;80;82;89;90;91;95;96;97;98;99;100;101;103;104;105;106;107;112;113;114;115;116;117;118;119;120;121;122;123;125;130;131;132;136;138;140;141;142;143;145;152;163;164;165;166;167;168;169;170;173;175;176;177;179;180;182;183;184;186;187	0;1;2;3;4;5;6;7;8;9;10;11;12;13;14;15;16;17;18;19;20;21;22;23;24;25;26;27;28;29;30;31;32;33;34;35;36;37;38;39;40;41;42;43;44;45;46;47;48;49;50;51;55;56;57;58;59;60;61;62;63;64;65;66;67;68;69;70;71;72;73;74;75;76;77;78;79;80;81;82;83;84;85;86;87;88;89;96;97;98;99;100;101;102;103;104;105;106;107;108;109;110;116;117;118;119;120;121;122;123;124;125;126;127;128;129;130;131;132;133;134;135;136;137;138;…	0;1;2;3;4;5;6;7;8;9;10;11;12;13;14;15;16;17;18;19;20;21;22;23;24;25;26;27;28;29;30;31;32;33;34;35;36;37;38;39;40;41;42;43;44;45;46;47;48;49;50;51;52;53;54;55;56;57;58;59;60;61;62;63;64;65;66;67;68;69;70;71;72;73;74;75;76;77;78;79;80;81;82;83;84;85;86;87;88;89;90;91;92;93;94;95;96;97;98;99;100;101;102;103;104;105;106;107;108;109;110;111;112;113;114;115;116;120;121;122;123;124;125;126;127;128;129;1…	7;14;63;139;149;169;181;204;231;232;243;280;322;372;397;407;419;451;479;512;526;558;584;630;684;744;773;790;794;828;875;882;886;935;977;989;1010;1016;1107;1116;1138;1140;1161;1199;1243;1368;1377;1416;1432;1488;1644;1738;1762;1832;1893;1907;1919;1940;1942;1977;2018;2052;2068;2085;2100;2115;2124;2170;2292;2340;2362;2381;2458;2489;2499;2591;2642;2668;2692;2698;2703;2714	15;16;17;18;19;20;21;22;23;24;25;26;27;28;29	4;6;8;9;10;11;12;13;14;15;16;17;18	53;58;111;138;250;263;397;435;467;529;624;762;765;946;962	259;275;288;538;557;599;620;623;627;636;687;1028;1050
C4R8P5	C4R8P5	1	1	1	Cytoplasmic isoleucine-tRNA synthetase, target of the G1-specific inhibitor reveromycin A OS=Komagataella phaffii (strain GS115 / ATCC 20864) GN=PAS_chr4_0709 PE=3 SV=1	1	1	1	1	1	1	1	1	1	1	0.9	0.9	0.9	123.38	1072	1072	0	7.2347	0.9	0.9	56103000	31888000	24215000	16				16	110	TRUE	137	1083;1084;1085;1086;1087;1088;1089;1090;1091;1092;1093;1094	2019;2020;2021;2022;2023;2024;2025;2026;2027;2028;2029;2030;2031;2032;2033;2034	2032
C4QX90	C4QX90	1	1	1	tRNA-specific 2-thiouridylase, responsible for 2-thiolation of the wobble base of mitochondrial tRNA OS=Komagataella phaffii (strain GS115 / ATCC 20864) GN=PAS_chr1-4_0029 PE=4 SV=1	1	1	1	1	0	1	0	1	0	1	2.5	2.5	2.5	46.041	398	398	1	-2	0	2.5	26547000	0	26547000	1	+			2	89	TRUE	109	885	1706	1706		0;1		1;2
C4QVL4	C4QVL4	6	6	6	1,3-beta-glucanosyltransferase OS=Komagataella phaffii (strain GS115 / ATCC 20864) GN=PAS_chr1-3_0226 PE=3 SV=1	1	6	6	6	4	6	4	6	4	6	16.5	16.5	16.5	57.29	538	538	0	105.51	10.6	16.5	22908000	12557000	10351000	23				0	18;21;119;122;139;153	True;True;True;True;True;True	19;23;146;149;171;188	185;186;187;188;212;213;214;215;216;1156;1169;1170;1171;1172;1173;1174;1325;1326;1327;1328;1329;1330;1448;1449;1450	361;362;363;364;402;403;404;405;406;2136;2153;2154;2155;2156;2157;2158;2159;2160;2491;2492;2493;2494;2495;2496;2718;2719;2720	361;406;2136;2157;2493;2719	0		162
C4R1P9	C4R1P9	9	9	9	Pyruvate kinase OS=Komagataella phaffii (strain GS115 / ATCC 20864) GN=PAS_chr2-1_0769 PE=3 SV=1	1	9	9	9	6	6	6	6	6	6	24.2	24.2	24.2	55.572	505	505	0	73.892	14.7	18.4	18944000	9543300	9400900	31				7	46;53;71;74;90;106;117;124;132	True;True;True;True;True;True;True;True;True	56;64;83;86;110;133;144;151;162	464;465;466;467;468;469;520;660;667;668;886;1070;1071;1141;1142;1143;1144;1180;1181;1182;1253;1254;1255;1256;1257;1258	847;848;849;850;851;852;853;854;855;856;944;1214;1221;1222;1707;2005;2006;2116;2117;2118;2119;2166;2167;2168;2169;2284;2285;2286;2287;2288;2289	851;944;1214;1222;1707;2006;2117;2169;2286
C4R2D7	C4R2D7	2	2	2	Uncharacterized protein OS=Komagataella phaffii (strain GS115 / ATCC 20864) GN=PAS_chr2-2_0482 PE=4 SV=1	1	2	2	2	2	2	2	2	2	2	6.9	6.9	6.9	91.098	839	839	0	25.148	6.9	6.9	6821100	3643500	3177700	12				8	55;126	True;True	66;153	524;525;526;527;1189;1190;1191;1192;1193;1194	950;951;952;953;954;2192;2193;2194;2195;2196;2197;2198	953;2196
C4R5L2	C4R5L2	1	1	1	Uncharacterized protein OS=Komagataella phaffii (strain GS115 / ATCC 20864) GN=PAS_chr3_1222 PE=4 SV=1	1	1	1	1	0	1	0	1	0	1	2.4	2.4	2.4	58.578	506	506	0	6.2607	0	2.4	2263800	0	2263800	1				13	57	TRUE	68	533	960	960
C4R887;C4R3X8	C4R887;C4R3X8	1;1	1;1	1;1	ATPase involved in protein folding and nuclear localization signal (NLS)-directed nuclear transport OS=Komagataella phaffii (strain GS115 / ATCC 20864) GN=PAS_chr4_0552 PE=3 SV=1; ATPase involved in protein folding and the response to stress OS=Komagatael	2	1	1	1	1	1	1	1	1	1	2.5	2.5	2.5	69.634	645	645;657	0	6.3776	2.5	2.5	1597000	421420	1175500	4				11	10	TRUE	10	111;112;113;114	209;210;211;212	209
C4R024	C4R024	1	1	1	Malate dehydrogenase OS=Komagataella phaffii (strain GS115 / ATCC 20864) GN=PAS_chr2-1_0238 PE=3 SV=1	1	1	1	1	1	1	1	1	1	1	3	3	3	34.907	334	334	0	6.7254	3	3	1284200	544800	739350	4				6	59	TRUE	70	535;536;537;538	962;963;964;965	965
C4R3H3	C4R3H3	1	1	1	Uncharacterized protein OS=Komagataella phaffii (strain GS115 / ATCC 20864) GN=PAS_chr3_0076 PE=3 SV=1	1	1	1	1	1	0	1	0	1	0	3.2	3.2	3.2	31.886	313	313	0	6.4969	3.2	0	1147500	1147500	0	2				10	156	TRUE	191	1459;1460	2733;2734	2734
C4QZB0	C4QZB0	1	1	1	Elongation factor 1-alpha OS=Komagataella phaffii (strain GS115 / ATCC 20864) GN=PAS_FragB_0052 PE=3 SV=1	1	1	1	1	1	1	1	1	1	1	2.4	2.4	2.4	50.131	459	459	0	7.08	2.4	2.4	957940	309690	648250	5				4	54	TRUE	65	521;522;523	945;946;947;948;949	948
C4QX36	C4QX36	1	1	1	Ketol-acid reductoisomerase, mitochondrial OS=Komagataella phaffii (strain GS115 / ATCC 20864) GN=PAS_chr1-1_0432 PE=3 SV=1	1	1	1	1	1	1	1	1	1	1	2.5	2.5	2.5	44.31	398	398	0	6.7106	2.5	2.5	952230	301410	650830	3				1	33	TRUE	41	361;362;363	680;681;682	682
C4R2N5	C4R2N5	1	1	1	ATP synthase subunit beta OS=Komagataella phaffii (strain GS115 / ATCC 20864) GN=PAS_chr2-2_0165 PE=3 SV=1	1	1	1	1	1	1	1	1	1	1	2.4	2.4	2.4	54.025	503	503	0	6.5251	2.4	2.4	784550	297010	487540	0				9	56	TRUE	67	528;529;530;531;532	955;956;957;958;959	955
C4QYV4	C4QYV4	1	1	1	Transcription-associated protein OS=Komagataella phaffii (strain GS115 / ATCC 20864) GN=PAS_chr1-4_0571 PE=3 SV=1	1	1	1	1	1	0	1	0	1	0	0.3	0.3	0.3	437.55	3825	3825	1	-2	0.3	0	0	0	0	0	+			3	88	TRUE	108	884	1704;1705	1705	1;2	2	450;454	457
C4QZC0	C4QZC0	1	1	1	Polyadenylation factor subunit 2 OS=Komagataella phaffii (strain GS115 / ATCC 20864) GN=PAS_FragB_0063 PE=4 SV=1	1	1	1	1	1	1	1	1	1	1	3	3	3	50.011	439	439	1	-2	3	3	0	0	0	0	+			5	155	TRUE	190	1457;1458	2731;2732	2731	3;4;5;6		154;156;157;159
C4R4T0	C4R4T0	1	1	1	Putative GPI-anchored protein OS=Komagataella phaffii (strain GS115 / ATCC 20864) GN=PAS_chr3_0517 PE=4 SV=1	1	1	1	1	0	1	0	1	0	1	6.3	6.3	6.3	31.376	286	286	0	15.791	0	6.3	0	0	0	0				12	41	TRUE	51	434;435;436	799;800;801;802	802	7		142
C4R6Y0	C4R6Y0	1	1	1	Chromatin-remodeling complex ATPase OS=Komagataella phaffii (strain GS115 / ATCC 20864) GN=PAS_chr4_0128 PE=3 SV=1	1	1	1	1	1	0	1	0	1	0	1.3	1.3	1.3	114.3	983	983	0	6.0902	1.3	0	0	0	0	1				14	58	TRUE	69	534	961	961
C4R7H3	C4R7H3	1	1	1	Uncharacterized protein OS=Komagataella phaffii (strain GS115 / ATCC 20864) GN=PAS_chr4_0309 PE=4 SV=1	1	1	1	1	1	0	1	0	1	0	4.1	4.1	4.1	23.064	195	195	0	6.0524	4.1	0	0	0	0	0				15	76	TRUE	88	672;673	1226;1227;1228	1227	8		60
C4R8R3	C4R8R3	1	1	1	Uncharacterized protein OS=Komagataella phaffii (strain GS115 / ATCC 20864) GN=PAS_chr4_0985 PE=4 SV=1	1	1	1	1	1	0	1	0	1	0	2.5	2.5	2.5	66.618	571	571	1	-2	2.5	0	0	0	0	0	+			17	51	TRUE	62	515	939	939	9	3	496	491

## Sheet: Deamidation 18O rhCP
Proteins	Positions within proteins	Leading proteins	Protein	Fasta headers	Localization prob	Score diff	PEP	Score	Delta score	Score for localization	Localization prob 18H2O	Score diff 18H2O	PEP 18H2O	Score 18H2O	Localization prob PNGF_18H2O	Score diff PNGF_18H2O	PEP PNGF_18H2O	Score PNGF_18H2O	Diagnostic peak	Number of Deamidation 18O (N)	Amino acid	Sequence window	Modification window	Peptide window coverage	Deamidation 18O (N) Probabilities	Deamidation 18O (N) Score diffs	Position in peptide	Charge	Mass error [ppm]	Intensity	Intensity___1	Intensity___2	Intensity___3	Ratio mod/base	Intensity 18H2O	Intensity PNGF_18H2O	Ratio mod/base 18H2O	Ratio mod/base PNGF_18H2O	Intensity 18H2O___1	Intensity 18H2O___2	Intensity 18H2O___3	Intensity PNGF_18H2O___1	Intensity PNGF_18H2O___2	Intensity PNGF_18H2O___3	Occupancy 18H2O	Occupancy ratio18H2O	Occupancy error scale 18H2O	Occupancy PNGF_18H2O	Occupancy ratioPNGF_18H2O
Humanceruloplasmin(M13699)	53	Humanceruloplasmin(M13699)	Humanceruloplasmin(M13699)		1	47.0818	2.66268e-06	72.359	68.497	47.082										1;2	N	DHGEKKLISVDTEHSNIYLQNGPDRIGRLYK	X;X;X;X;X;X;X;X;X;X;X;X;X;X;X;Deamidation 18O (N);X;X;X;X;Deamidation 18O (N);X;X;X;X;X;X;X;X;X;X	XXXXXXPPPPPPPPPPPPPPPPPPPXXXXXX	LISVDTEHSN(1)IYLQN(1)GPDR	LISVDTEHSN(47.08)IYLQN(47.08)GPDR	10	3	1.9939	3312400	1833700	1478700	0	0.0017166	3312400	0	0.0039604	0	1833700	1478700	0	0	0	0
Humanceruloplasmin(M13699)	58	Humanceruloplasmin(M13699)	Humanceruloplasmin(M13699)		1	47.0818	3.83409e-21	177.6	174.16	47.082										1;2	N	KLISVDTEHSNIYLQNGPDRIGRLYKKALYL	X;X;X;X;X;X;X;X;X;X;Deamidation 18O (N);X;X;X;X;Deamidation 18O (N);X;X;X;X;X;X;X;X;X;X;X;X;X;X;X	PPPPPPPPPPPPPPPPPPPPXXXXXXXXXXX	LISVDTEHSN(1)IYLQN(1)GPDR	LISVDTEHSN(47.08)IYLQN(47.08)GPDR	15	3	1.9939	1393700000	1392200000	1478700	0	0.72226	12533000	14989000	0.014984	0.013711	11054000	1478700	0	14989000	0	0
Humanceruloplasmin(M13699)	111	Humanceruloplasmin(M13699)	Humanceruloplasmin(M13699)		1	43.7941	5.44882e-06	72.433	55.192	43.794										1	N	IIKAETGDKVYVHLKNLASRPYTFHSHGITY	X;X;X;X;X;X;X;X;X;X;X;X;X;X;X;Deamidation 18O (N);X;X;X;X;X;X;X;X;X;X;X;X;X;X;X	XXXXXXXXXXXXXXXPPPPPPPPPPPPPPPP	N(1)LASRPYTFHSHGITYYK	N(43.79)LASRPYTFHSHGITYYK	1	4	-0.41357	3063300	3063300	0	0	0.015644	2497400	565900	0.023728	0.006249	2497400	0	0	565900	0	0
Humanceruloplasmin(M13699)	138	Humanceruloplasmin(M13699)	Humanceruloplasmin(M13699)		1	84.5076	9.55874e-43	228.51	223.75	84.508										1	N	GITYYKEHEGAIYPDNTTDFQRADDKVYPGE	X;X;X;X;X;X;X;X;X;X;X;X;X;X;X;Deamidation 18O (N);X;X;X;X;X;X;X;X;X;X;X;X;X;X;X	XXXXXXPPPPPPPPPPPPPPPPXXXXXXXXX	EHEGAIYPDN(1)TTDFQR	EHEGAIYPDN(84.51)TTDFQR	10	3	0.71869	295250000	295250000	0	0	0.33598	7089600	243940000	0.014802	0.61012	7089600	0	0	243940000	0	0
Humanceruloplasmin(M13699)	250	Humanceruloplasmin(M13699)	Humanceruloplasmin(M13699)		0.999111	30.5092	0.000176697	51.431	50.25	51.431										1	N	NIKTYCSEPEKVDKDNEDFQESNRMYSVNGY	X;X;X;X;X;X;X;X;X;X;X;X;X;X;X;Deamidation 18O (N);X;X;X;X;X;X;X;X;Oxidation (M);X;X;X;Deamidation 18O (N);X;X	XXXPPPPPPPPPPPPPPPPPPPPPXXXXXXX	TYCSEPEKVDKDN(0.999)EDFQESN(0.001)R	TYCSEPEKVDKDN(30.51)EDFQESN(-30.51)R	13	4	0.24465	2538400	2538400	0	0	0.00094757	0	2538400	0	0.0021167	0	0	0	2538400	0	0
Humanceruloplasmin(M13699)	263	Humanceruloplasmin(M13699)	Humanceruloplasmin(M13699)		1	128.01	9.2313e-147	324.72	324.49	128.01										1	N	KDNEDFQESNRMYSVNGYTFGSLPGLSMCAE	X;X;Deamidation 18O (N);X;X;X;X;X;X;X;X;Oxidation (M);X;X;X;Deamidation 18O (N);X;X;X;X;X;X;X;X;X;X;X;Oxidation (M);X;X;X	XXXXXXXXXXXPPPPPPPPPPPPPPPPPPPP	MYSVN(1)GYTFGSLPGLSMCAEDR	MYSVN(128.01)GYTFGSLPGLSMCAEDR	5	3	-1.9303	223370000	223370000	0	0	3.2606	5741900	4940400	0.74095	0.081313	5741900	0	0	4940400	0	0
Humanceruloplasmin(M13699)	397	Humanceruloplasmin(M13699)	Humanceruloplasmin(M13699)		1	224.104	1.11298e-45	224.1	217.58	224.1										1	N	IWNYAPSGIDIFTKENLTAPGSDSAVFFEQG	X;X;X;X;X;X;X;X;X;X;X;X;X;X;X;Deamidation 18O (N);X;X;X;X;X;X;X;X;X;X;X;X;X;X;X	XXXXXXXXXXXXXXPPPPPPPPPPPPPPPPP	EN(1)LTAPGSDSAVFFEQGTTR	EN(224.1)LTAPGSDSAVFFEQGTTR	2	2	0.34636	1178000000	1178000000	0	0	4.2573	0	873520000	0	6.2394	0	0	0	873520000	0	0
Humanceruloplasmin(M13699)	435	Humanceruloplasmin(M13699)	Humanceruloplasmin(M13699)		1	92.611	0.000288258	110.08	107.03	92.611										1	N	YKKLVYREYTDASFTNRKERGPEEEHLGILG	X;X;X;X;X;X;X;X;X;X;X;X;X;X;X;Deamidation 18O (N);X;X;X;X;X;X;X;X;X;X;X;X;X;X;X	XXXXXXXPPPPPPPPPPPXXXXXXXXXXXXX	EYTDASFTN(1)RK	EYTDASFTN(92.61)RK	9	2	0.69913	4311300	4311300	0	0	0.002343	2014000	844170	0.0019641	0.0010362	2014000	0	0	844170	0	0
Humanceruloplasmin(M13699)	467	Humanceruloplasmin(M13699)	Humanceruloplasmin(M13699)		1	57.5251	1.40633e-13	108.71	107.35	57.525										1	N	VIWAEVGDTIRVTFHNKGAYPLSIEPIGVRF	X;X;X;X;X;X;X;X;X;X;X;X;X;X;X;Deamidation 18O (N);X;X;X;X;X;X;X;X;X;X;X;X;X;X;X	XXXXXXXXXXXPPPPPPPPPPPPPPPPPPPX	VTFHN(1)KGAYPLSIEPIGVR	VTFHN(57.53)KGAYPLSIEPIGVR	5	4	-0.2072	5239500	5239500	0	0	0.020082	1424700	702970	0.0092474	0.0065798	1424700	0	0	702970	0	0
Humanceruloplasmin(M13699)	529	Humanceruloplasmin(M13699)	Humanceruloplasmin(M13699)		1	107.465	7.27824e-33	224.34	203.53	107.46										1	N	TFTYEWTVPKEVGPTNADPVCLAKMYYSAVD	X;X;X;X;X;X;X;X;X;X;X;X;X;X;X;Deamidation 18O (N);X;X;X;X;X;X;X;X;Oxidation (M);X;X;X;X;X;X	XXXXXXXXXXPPPPPPPPPPPPPPXXXXXXX	EVGPTN(1)ADPVCLAK	EVGPTN(107.46)ADPVCLAK	6	2	0.88077	318760000	318760000	0	0	0.067561	139590000	108900000	0.057831	0.047257	139590000	0	0	108900000	0	0
Humanceruloplasmin(M13699)	624	Humanceruloplasmin(M13699)	Humanceruloplasmin(M13699)		1	85.0368	1.60289e-18	171.07	171.07	133.94										1	N	KEDEDFQESNKMHSMNGFMYGNQPGLTMCKG	X;X;X;X;X;X;X;X;X;X;X;Oxidation (M);X;X;Oxidation (M);Deamidation 18O (N);X;X;Oxidation (M);X;X;X;X;X;X;X;X;Oxidation (M);X;X;X	XXXXXXXXXXXPPPPPPPPPPPPPPPPPPPX	MHSMN(1)GFMYGNQPGLTMCK	MHSMN(85.04)GFMYGN(-85.04)QPGLTMCK	5	3	-0.1818	625930000	625930000	0	0	2.3409	33893000	31096000	0.22177	0.27143	33893000	0	0	31096000	0	0
Humanceruloplasmin(M13699)	762	Humanceruloplasmin(M13699)	Humanceruloplasmin(M13699)		1	75.682	1.76139e-104	281.4	272.82	75.682										1;2	N	PQREWEKELHHLQEQNVSNAFLDKGEFYIGS	X;X;X;X;X;X;X;X;X;X;X;X;X;X;X;Deamidation 18O (N);X;X;Deamidation 18O (N);X;X;X;X;X;X;X;X;X;X;X;X	XXXXXXXPPPPPPPPPPPPPPPPPPPPPPPP	ELHHLQEQN(1)VSN(1)AFLDK	ELHHLQEQN(75.68)VSN(75.68)AFLDK	9	3	0.27136	350740000	349770000	964260	0	5.0919	0	86314000	0	2.2496	0	0	0	85350000	964260	0
Humanceruloplasmin(M13699)	765	Humanceruloplasmin(M13699)	Humanceruloplasmin(M13699)		1	75.682	5.54442e-06	75.682	70.013	75.682										1;2	N	EWEKELHHLQEQNVSNAFLDKGEFYIGSKYK	X;X;X;X;X;X;X;X;X;X;X;X;Deamidation 18O (N);X;X;Deamidation 18O (N);X;X;X;X;X;X;X;X;X;X;X;X;X;X;X	XXXXPPPPPPPPPPPPPPPPPXXXXXXXXXX	ELHHLQEQN(1)VSN(1)AFLDK	ELHHLQEQN(75.68)VSN(75.68)AFLDK	12	3	0.27136	6957200	5993000	964260	0	0.101	0	6957200	0	0.18132	0	0	0	5993000	964260	0
Humanceruloplasmin(M13699)	946	Humanceruloplasmin(M13699)	Humanceruloplasmin(M13699)		1	129.384	2.43976e-09	169.79	163.32	135.47										1	N	LDDNIKTYSDHPEKVNKDDEEFIESNKMHAI	X;X;X;X;X;X;X;X;X;X;X;X;X;X;X;Deamidation 18O (N);X;X;X;X;X;X;X;X;X;X;X;X;X;X;X	XXXXXXXXXXXXXXPPPPPPPPPPPPPXXXX	VN(1)KDDEEFIESNK	VN(129.38)KDDEEFIESN(-129.38)K	2	2	0.050689	66695000	66695000	0	0	0.018241	15603000	13077000	0.007756	0.0079515	15603000	0	0	13077000	0	0
Humanceruloplasmin(M13699)	962	Humanceruloplasmin(M13699)	Humanceruloplasmin(M13699)		0.99996	44.0206	8.09693e-21	118.96	114.76	115.1										1	N	KDDEEFIESNKMHAINGRMFGNLQGLTMHVG	X;X;X;X;X;X;X;X;X;X;X;X;X;X;X;Deamidation 18O (N);X;X;X;X;X;X;X;X;X;X;X;X;X;X;X	PPPPPPPPPPPPPPPPPPXXXXXXXXXXXXX	DDEEFIESNKMHAIN(1)GR	DDEEFIESN(-44.02)KMHAIN(44.02)GR	15	3	0.31109	14347000	14347000	0	0	NaN	0	3048000	NaN	NaN	0	0	0	3048000	0	0
[truncated: 23 more columns]
